# Supplementary material for: Genome–Wide Investigation of the CBL–CIPK Gene Family in Oil Persimmon: Evolution, Function and Expression Analysis during Development and Stress
Source: MDPI journal article supplement (doi:10.3390/horticulturae9010030), 2022-12-27
Supplement: s1 [file s1]

(a)

750 bp

500 bp

*DoCBL5*

|           |     |                                                                                |     |
|-----------|-----|--------------------------------------------------------------------------------|-----|
| Reference | 1   | ATGGGCTGTTTTAGTTCTACCGTAAGAAAGCAGTTTGCTGGGTATGAGGACCCAGTAGTTTTGGCTTCACAAACGG   | 76  |
| Cloned    | 1   | ATGGGCTGTTTTAGTTCTACCGTAAGAAAGCAGTTTGCTGGGTATGAGGACCCAGTAGTTTTGGCTTCACAAACGG   | 76  |
| Reference | 77  | CTTTTAGTGTGAGTGAAGTTGAAGCACTGTTTGAGCTGTTTAGGAGCATTAGCAGTTCCGTGCTTGATGATGGACT   | 152 |
| Cloned    | 77  | CTTTTAGTGTGAGTGAAGTTGAAGCACTGTTTGAGCTGTTTAGGAGCATTAGCAGTTCCGTGCTTGATGATGGACT   | 152 |
| Reference | 153 | AATAACAAGGAAGAGTTTCAATTGGCTCTATTCAAGAATAGAAAGAAAGAGAATCTTTTCTCCGACAGGATATTT    | 228 |
| Cloned    | 153 | AATAACAAGGAAGAGTTTCAATTGGCTCTATTCAAGAATAGAAAGAAAGAGAATCTTTTCTCCGACAGGATATTT    | 228 |
| Reference | 229 | GATCTATTTGATGTTAAGCGGAAGGGAGTCATTGATTTTGGTGATTTTGTTAGATCACTCAACGTATTCCATCCAA   | 304 |
| Cloned    | 229 | GATCTATTTGATGTTAAGCGGAAGGGAGTCATTGATTTTGGTGATTTTGTTAGATCACTCAACGTATTCCATCCAA   | 304 |
| Reference | 305 | ATGCCCCACTAGAACATAAAATAGACTTTTCTTTTAAACTCTACGATTTGGATGGGACAGGATTCATTGAACGACA   | 380 |
| Cloned    | 305 | ATGCCCCACTAGAACATAAAATAGACTTTTCTTTTAAACTCTACGATTTGGATGGGACAGGATTCATTGAACGACA   | 380 |
| Reference | 381 | AGAGGTCAAGCAAATGTTAATTGCACTACTGTCTGAGTCCGAGATGAAGCTGGCTGATGAGACCATTGAGATAATT   | 456 |
| Cloned    | 381 | AGAGGTCAAGCAAATGTTAATTGCACTACTGTCTGAGTCCGAGATGAAGCTGGCTGATGAGACCATTGAGATAATT   | 456 |
| Reference | 457 | CTAGATAAGACATTTTCAGAAGCAGATGCAGATGAGGATGGGAAGATCGGCCAAATTTGGAGTGGCAGAATTTTGTCA | 532 |
| Cloned    | 457 | CTAGATAAGACATTTTCAGAAGCAGATGCAGATGAGGATGGGAAGATCGGCCAAATTTGGAGTGGCAGAATTTTGTCA | 532 |
| Reference | 533 | ACCGAAACCCTTCGTTGTTAAAGATTATGACGCTTCCATACCTAAGGGACATAACCACAACATTTCCGAGCTTTAT   | 608 |
| Cloned    | 533 | ACCGAAACCCTTCGTTGTTAAAGATTATGACGCTTCCATACCTAAGGGACATAACCACAACATTTCCGAGCTTTAT   | 608 |
| Reference | 609 | ATTTCAATTCAGAGGTCGATGAGATTGCTACATAA                                            | 642 |
| Cloned    | 609 | ATTTCAATTCAGAGGTCGATGAGATTGCTACA - -                                           | 639 |

(b)

2000 bp

1000 bp

*DoCIPK05*

|           |      |                                                                                   |      |
|-----------|------|-----------------------------------------------------------------------------------|------|
| Reference | 1    | ATGGCCGAGAAGAGTGTGCTCCACGGGAAGTACGAGCTAGGCCGGATGCTAGGCCATGGGACCTTTGCAAAGGTCT      | 76   |
| Cloned    | 1    | ATGGCCGAGAAGAGTGTGCTCCACGGGAAGTACGAGCTAGGCCGGATGCTAGGCCATGGGACCTTTGCAAAGGTCT      | 76   |
| Reference | 77   | ACCACGCCTCGGAACCTTGCATACCGGGAAGAGCGTAGCGATGAAGGTCGTCGGGAAGGAGAAGGTGATCAAAGGTCTCGG | 152  |
| Cloned    | 77   | ACCACGCCTCGGAACCTTGCATACCGGGAAGAGCGTAGCGATGAAGGTCGTCGGGAAGGAGAAGGTGATCAAAGGTCTCGG | 152  |
| Reference | 153  | AATGACTGAGCAGGTGAAGCGTGAGATATCAGTGATGAAGATGGTGAAGCATCCGAACATCGTGGAGCTTACGAAAG     | 228  |
| Cloned    | 153  | AATGACTGAGCAGGTGAAGCGTGAGATATCAGTGATGAAGATGGTGAAGCATCCGAACATCGTGGAGCTTACGAAAG     | 228  |
| Reference | 229  | GTCATGGCGAGCAAGTCCAAGATCTACTTCGCCATGGAGCTTGTCCGCGGC GGCGAGCTGTTTTCCAAGATCGCCA     | 304  |
| Cloned    | 229  | GTCATGGCGAGCAAGTCCAAGATCTACTTCGCCATGGAGCTTGTCCGCGGC GGCGAGCTGTTTTCCAAGATCGCCA     | 304  |
| Reference | 305  | AGGGAAGACTCCGGGAAGACTTGGCTAGGCAGTACTTCCAGCAACTCATCTCAGCCGTCGACTTCTGCCACAGCCG      | 380  |
| Cloned    | 305  | AGGGAAGACTCCGGGAAGACTTGGCTAGGCAGTACTTCCAGCAACTCATCTCAGCCGTCGACTTCTGCCACAGCCG      | 380  |
| Reference | 381  | CGGCGTCTACCACCGGGATCTGAAGCCGGAGAACCTTCTGCTTGACGACGGCGGTAACCTCAAGGTGACGGACTTT      | 456  |
| Cloned    | 381  | CGGCGTCTACCACCGGGATCTGAAGCCGGAGAACCTTCTGCTTGACGACGGCGGTAACCTCAAGGTGACGGACTTT      | 456  |
| Reference | 457  | GGTCTGAGCGCGTTTTTCCGGTCACCAGCGGCAGGACGGGCTGCTCCACACGACGTGCGGGACGCCGGCTTACGTCTG    | 532  |
| Cloned    | 457  | GGTCTGAGCGCGTTTTTCCGGTCACCAGCGGCAGGACGGGCTGCTCCACACGACGTGCGGGACGCCGGCTTACGTCTG    | 532  |
| Reference | 533  | CGCCAGAGGTAATCGGGAAGAAGGGCTATGACGGAGCCAAGGCGGACCTCTGGTCTTGCGGCGTTATTCTGTACGT      | 608  |
| Cloned    | 533  | CGCCAGAGGTAATCGGGAAGAAGGGCTATGACGGAGCCAAGGCGGACCTCTGGTCTTGCGGCGTTATTCTGTACGT      | 608  |
| Reference | 609  | ATTGTTGGCCGGTTTTTCTGCCTTTTTCAGGAGGATAACATTGTGGCCATGTACCGGAAGATTTACAGGGGCGACTTC    | 684  |
| Cloned    | 609  | ATTGTTGGCCGGTTTTTCTGCCTTTTTCAGGAGGATAACATTGTGGCCATGTACCGTAAGATTTACAGGGGCGACTTC    | 684  |
| Reference | 685  | AAGTGCCCGCCGTGGTTCTCGCCGGAATCCCGACGATTAGTAACCAAGCTGTTGGATCCGAATCCGAGCAGTCGAA      | 760  |
| Cloned    | 685  | AAGTGCCCGCCGTGGTTCTCGCCGGAATCCCGACGATTAGTAACCAAGCTGTTGGATCCGAATCCGAGCAGTCGAA      | 760  |
| Reference | 761  | TCAGCATCTCAAAAATCATGGAATCGTCGTGGTTCAAGACAACGATCCCGAAATCTGTGAGATCCAAAGAGGAGGA      | 836  |
| Cloned    | 761  | TCAGCATCTCAAAAATCATGGAATCGTCGTGGTTCAAGACGACGATCCCGAAATCTGTGAGATCCAAAGAGGAGGA      | 836  |
| Reference | 837  | AGAGGAATCAAACCTCGAAGACGGCGGGAAGAAGAAGGAAACAGAGACTCTGAACGCGTTTTACATAATATCTTTG      | 912  |
| Cloned    | 837  | AGAGGAATCAAACCTCGAAGACGGCGGGAAGAAGAAGGAAACAGAGACTCTGAACGCGTTTTACATAATATCTTTG      | 912  |
| Reference | 913  | TCGGAAGGTTTTCGATCTGTGCGCCATTATTTGAGGTGAAGAAAAGGAAAAGAGAAGGAGGAGATGAGATTTGCTACGA   | 988  |
| Cloned    | 913  | TCGGAAGGTTTTCGATCTGTGCGCCATTATTTGAGGTGAAGAAAAGGAAAAGAGAAGGAGGAGATGAGATTTGCTACGA   | 988  |
| Reference | 989  | CGCAGCCGGCGAGCAGCGTGATTTCTCGGCTGGAGGAGGTGGCGGCGAAGACCGGAAAATTTCTGCGTGAAGAAGAG     | 1064 |
| Cloned    | 989  | CGCAGCCGGCGAGCAGCGTGATTTCTCGGCTGGAGGAGGTGGCGGCGAAGACCGGAAAATTTCTGCGTGAAGAAGAG     | 1064 |
| Reference | 1065 | CGGCGATATGACGAGCGTGATGCTGCAGGGACAGGAGTCCGGGCGGAAGGGGAAGCTCGGAATCGAGGCGGAGATA      | 1140 |
| Cloned    | 1065 | CGGCGATATGACGAGCGTGATGCTGCAGGGACAGGAGTCCGGGCGGAAGGGGAAGCTCGGAATCGAGGCGGAGATA      | 1140 |
| Reference | 1141 | TTGCGGGTGGCGCCGTGCTTCCTGATGGTGGAGGTGAAGAAGTCCAGCGGC GACACGCTCGAGTACAACCAGTTCT     | 1216 |
| Cloned    | 1141 | TTGCGGGTGGCGCCGTGCTTCCTGATGGTGGAGGTGAAGAAGTCCAGCGGC GACACGCTCGAGTACAACCAGTTCT     | 1216 |
| Reference | 1217 | GCAGCCAGCTTCGTCCCGCTCTCAAAGACATCGTCTGGACCAATAGCTCGACGCCGGCTTGA                    | 1278 |
| Cloned    | 1217 | GCAGCCAGCTTCGTCCCGCGCTCAAAGACATCGTCTGGACCAATAGCTCGACGCCGGCT                       | 1275 |
